# Supplementary material for: The Influence of Tacrolimus Exposure and Metabolism on the Outcomes of Kidney Transplants
Source: MDPI journal article supplement (doi:10.3390/biomedicines12051125), 2024-05-18
Supplement: s1 [file s1]

**Supplement Table S1.** Clinical data of patients according to interstitial fibrosis and tubular atrophy progression between surveillance biopsies.

| Variable                                    | No IFTA progression<br>n=59 | IFTA progression<br>n=72 | P value      |
|---------------------------------------------|-----------------------------|--------------------------|--------------|
| Recipient age, years                        | 50.51±12.02                 | 44.31±13.13              | <b>0.006</b> |
| Donor age, years                            | 48.7±16.6                   | 53.6±15/5                | 0.118        |
| Donor evaluation SCD/ECD, %                 | 59.3/40.7                   | 43.1/56.9                | 0.085        |
| Donor hypertension, %                       | 37.3                        | 63.9                     | <b>0.002</b> |
| Cold ischemia time, hours                   | 16.27±4.84                  | 16.22±4.3                | 0.651        |
| DGF, %                                      | 16.9                        | 27.8                     | 0.142        |
| Rejection episode, %                        | 12.1                        | 27.8                     | <b>0.028</b> |
| Proteinuria 1year g/l                       | 0.107±0.24                  | 0.124±0.37               | 0.704        |
| eGFR at 3 months, ml/min/1,73m <sup>2</sup> | 57.14±16.28                 | 47.82±16.45              | <b>0.003</b> |
| eGFR at 6 months, ml/min/1,73m <sup>2</sup> | 54.14±19.75                 | 44.99±19.79              | <b>0.007</b> |
| eGFR at 1year, ml/min/1,73m <sup>2</sup>    | 57.48±16.57                 | 47.82±16.45              | <b>0.002</b> |
| eGFR at 2 years, ml/min/1,73m <sup>2</sup>  | 57.64±16.38                 | 49.50±19.36              | <b>0.033</b> |
| eGFR at 3 years, ml/min/1,73m <sup>2</sup>  | 60.14±17.43                 | 48.22±18.76              | <b>0.012</b> |

*DGF-delayed graft function, ECD-extended criteria donor, eGFR-estimated glomerular filtration rate, IF/TA – interstitial fibrosis and tubular atrophy, SCD- standard criteria donor; values present as mean, percent*

**Supplement Table S2.** Tacrolimus monitoring and biomarkers data according to interstitial fibrosis and tubular atrophy progression between biopsies.

| Variable                             | No IF/TA progression from zero biopsy to 3months biopsy | IF/TA progression from zero biopsy to 3months biopsy | P value | No IF/TA progression from 3 months to 1-year biopsies | IF/TA progression from 3 months to 1-year biopsies | P value      |
|--------------------------------------|---------------------------------------------------------|------------------------------------------------------|---------|-------------------------------------------------------|----------------------------------------------------|--------------|
| TAC dosis/weight 3 months (mg/kg)    | 0.128±0.047                                             | 0.123±0.046                                          | 0.659   | 0.110±0.425                                           | 0.130±0.0479                                       | 0.142        |
| TAC dosis/weight 6 months (mg/kg)    |                                                         |                                                      |         | 0.0911± 0.043                                         | 0.1120±0.060                                       | 0.260        |
| TAC dosis/weight 12 months (mg/kg)   |                                                         |                                                      |         | 0.0765±0.379                                          | 0.0861±0.07                                        | 0.909        |
| TAC C <sub>0</sub> 3 months (ng/ml)  | 9.56±2.837                                              | 9.18±3.209                                           | 0.512   | 9.1059±3.029                                          | 9.831±2.244                                        | 0.076        |
| TAC C <sub>0</sub> 6 months (ng/ml)  |                                                         |                                                      |         | 7.9441±2.8194                                         | 7.0483±2.296                                       | 0.177        |
| TAC C <sub>0</sub> 12 months (ng/ml) |                                                         |                                                      |         | 7.465±2.591                                           | 7.779±2.275                                        | 0.613        |
| C/D 3 months (ng/ml/mg)              | 1.31±0.893                                              | 1.31±0.817                                           | 0.832   | 1.22±0.59                                             | 1.32±0.91                                          | 0.788        |
| C/D 6 months (ng/ml/mg)              |                                                         |                                                      |         | 1.843±0.50                                            | 1.267±1.42                                         | 0.077        |
| C/D 12 months (ng/ml/mg)             |                                                         |                                                      |         | 1.387±0.62                                            | 1.57±1.20                                          | 0.836        |
| CV TAC-C <sub>0</sub>                | 26.79±11.15                                             | 28.53±11.44                                          | 0.448   | 25.997±11.47                                          | 28.544±10.54                                       | 0.379        |
| CV TAC-C <sub>0</sub> third tertile  |                                                         |                                                      |         | 39.975±7.28                                           | 38.052±6.172                                       | 0.52         |
| Log sNGAL 3 months                   | 3.943±0.414                                             | 4.038±0.568                                          | 0.418   | 4.066±0.44                                            | 3.71±0.43                                          | <b>0.029</b> |
| Log sNGAL 12 months                  |                                                         |                                                      |         | 3.91±0.37                                             | 4.086±0.45                                         | 0.671        |
| Log uNGAL 3 months                   | 2.997±0.715                                             | 3.3150±0.439                                         | 0.124   | 3.17±0.628                                            | 2.92±0.40                                          | 0.28         |
| Log uNGAL 12 months                  |                                                         |                                                      |         | 3.765±0.61                                            | 3.4788±0.83                                        | 0.328        |
| Log uKIM-1 3 months                  | 0.291±0.162                                             | 0.303±0.166                                          | 0.859   | 0.326±0.174                                           | 0.2878±0.014                                       | 0.586        |
| Log uKIM-1 12 months                 | 0.3107±0.245                                            | 0.2661±0.153                                         | 0.78    | 0.3107±0.245                                          | 0.2661±0.153                                       | 0.78         |
| Fast metabolizer at 3 months %       | 43.2                                                    | 52.4                                                 | 0.343   | 50                                                    | 48.8                                               | 0.682        |
| Fast metabolizer at 6 months %       |                                                         |                                                      |         | 47.1                                                  | 60.7                                               | 0.284        |
| Fast metabolizer 1 year %            |                                                         |                                                      |         | 35.3                                                  | 41.4                                               | 0.620        |

C/D-concentration doses ratio, CV-coefficient of variability, IF/TA – interstitial fibrosis and tubular atrophy, uKIM-1-urine kidney injury molecule-1, NGAL- serum and urine neutrophil gelatinase–associated lipocalin, TAC-tacrolimus, TAC C<sub>0</sub>- tacrolimus trough concentration;

values present as mean, percent;

biomarkers are log transformed
